# Supplementary material for: Kinetic Model of Catalytic Steam Gasification of 2-Methoxy-4-methylphenol Using 5% Ni–0.25% Ru/γAl2O3 in a CREC-Riser Simulator
Source: MDPI journal article supplement (doi:10.3390/catal12030282), 2022-03-02
Supplement: s1 [file s1]

## Supplementary Materials

### Kinetic Model of Catalytic Steam Gasification of 2-Methoxy-4-Methylphenol Using 5%Ni-0.25%Ru/ $\gamma$ Al<sub>2</sub>O<sub>3</sub> in a CREC-Riser Simulator.

Alán Rubén Calzada Hernandez<sup>1</sup>, Benito Serrano Rosales<sup>1,2</sup>, Hugo de Lasa<sup>3,\*</sup>

<sup>1</sup> DOCII, Unit of Electrical Sciences, Universidad Autonoma de Zacatecas, Campus UAZ Siglo XXI, Bldg 14, Carr. A Guadalajara Km. 7, Zactecas Zac., 98160, Mexico. alanosch@gmail.com;

<sup>2</sup> MCTQ, Unit of Chemical Sciences, Universidad Autonoma de Zacatecas, Campus UAZ Siglo XXI, Bldg. 5 & 6, Carr. a Guadalajara Km. 7, Zacatecas, Zac., 98160, Mexico; beniser@prodigy.net.mx;

<sup>3</sup> Faculty of Engineering, Chemical Reactor Engineering Centre (CREC), Western University, London, ON N6A 5B9, Canada; hdelasal@uwo.ca.

\* Correspondence: hdelasa@uwo.ca;

#### S1. Water Gas Shift Reaction Mechanism

The water-gas shift mechanism can be considered as a sequence of adsorption and reaction elementary steps as follows [27]

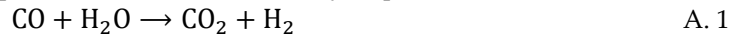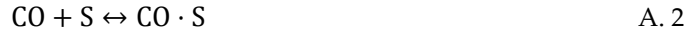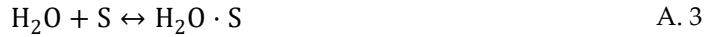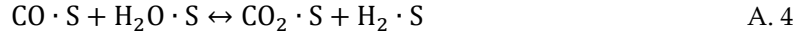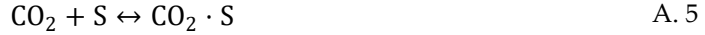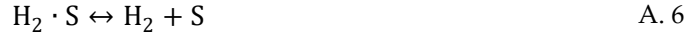

Thus, for every step of the postulated mechanism the following can be considered.

$$r_1 = k_{\text{CO}}^{\text{A}} \left( p_{\text{CO}} C_{\text{v}} - \frac{C_{\text{CO} \cdot \text{S}}}{K_{\text{CO}}^{\text{A}}} \right) \quad \text{A. 7}$$

$$r_2 = k_{\text{H}_2\text{O}}^{\text{A}} \left( p_{\text{H}_2\text{O}} C_{\text{v}} - \frac{C_{\text{H}_2\text{O} \cdot \text{S}}}{K_{\text{H}_2\text{O}}^{\text{A}}} \right) \quad \text{A. 8}$$

$$r_3 = k_{\text{s}} \left( C_{\text{CO} \cdot \text{S}} C_{\text{H}_2\text{O} \cdot \text{S}} - \frac{C_{\text{CO}_2 \cdot \text{S}} C_{\text{H}_2 \cdot \text{S}}}{K_{\text{s}}} \right) \quad \text{A. 9}$$

$$r_4 = k_{\text{CO}_2}^{\text{D}} \left( C_{\text{CO}_2 \cdot \text{S}} - \frac{p_{\text{CO}_2} C_{\text{v}}}{K_{\text{CO}_2}^{\text{D}}} \right) \quad \text{A. 10}$$

$$r_5 = k_{\text{H}_2}^{\text{D}} \left( C_{\text{H}_2 \cdot \text{S}} - \frac{p_{\text{H}_2} C_{\text{v}}}{K_{\text{H}_2}^{\text{D}}} \right) \quad \text{A. 11}$$

where  $K_{\text{CO}}^{\text{A}}$ ,  $K_{\text{H}_2\text{O}}^{\text{A}}$ ,  $K_{\text{CO}_2}^{\text{D}}$  and  $K_{\text{H}_2}^{\text{D}}$  are the equilibrium adsorption and desorption constants, and  $K_{\text{s}}$  the intrinsic equilibrium superficial reaction

Expressing the concentration of free and adsorbed species on the catalyst, in terms of species partial pressures the following results,

$$r_{\text{WGS}} = \frac{k'_{\text{WGS}} p_{\text{CO}} p_{\text{H}_2\text{O}}}{(1 + K_{\text{CO}}^A p_{\text{CO}} + K_{\text{H}_2\text{O}}^A p_{\text{H}_2\text{O}} + K_{\text{H}_2}^A p_{\text{H}_2} + K_{\text{CH}_4}^A p_{\text{CH}_4})^2} \left(1 - \frac{p_{\text{CO}_2} p_{\text{H}_2}}{K_{\text{WGS}} p_{\text{CO}} p_{\text{H}_2\text{O}}}\right) \quad \text{A. 12}$$

## S2. Rate Equations Using the Centering Temperature Method

Expressing the Arrhenius term of the rate equation using an average temperature reduces cross-correlation for the parameters. Thus, the differential equations of the present study can be re-written as follows, after substitution of Arrhenius term, in order to estimate the pre exponential factor and activation energy parameters:

$$\frac{dp_{\text{H}_2}}{dt} = \frac{\frac{W}{V} RT \left[ k_{\text{WGS}}^\circ \exp\left(\frac{E_{\text{WGS}}}{R} \left(\frac{1}{T} - \frac{1}{T_{\text{avg}}}\right)\right) \right] p_{\text{CO}} p_{\text{H}_2\text{O}}}{(1 + K_{\text{CO}_2}^A p_{\text{CO}_2})^2} \left(1 - \frac{p_{\text{CO}_2} p_{\text{H}_2}}{K_{\text{WGS}} p_{\text{CO}} p_{\text{H}_2\text{O}}}\right) \quad \text{B.1}$$

$$+ 3 \frac{\frac{W}{V} RT \left[ k_{\text{SRM}}^\circ \exp\left(\frac{E_{\text{SRM}}}{R} \left(\frac{1}{T} - \frac{1}{T_{\text{avg}}}\right)\right) \right] p_{\text{CH}_4} p_{\text{H}_2\text{O}}}{(1 + K_{\text{CO}_2}^A p_{\text{CO}_2})^4} \left(1 - \frac{p_{\text{CO}} p_{\text{H}_2}^3}{K_{\text{SRM}} p_{\text{CH}_4} p_{\text{H}_2\text{O}}}\right) \quad \text{B.2}$$

$$\frac{dp_{\text{CO}}}{dt} = - \frac{\frac{W}{V} RT \left[ k_{\text{WGS}}^\circ \exp\left(\frac{E_{\text{WGS}}}{R} \left(\frac{1}{T} - \frac{1}{T_{\text{avg}}}\right)\right) \right] p_{\text{CO}} p_{\text{H}_2\text{O}}}{(1 + K_{\text{CO}_2}^A p_{\text{CO}_2})^2} \left(1 - \frac{p_{\text{CO}_2} p_{\text{H}_2}}{K_{\text{WGS}} p_{\text{CO}} p_{\text{H}_2\text{O}}}\right) \\ + \frac{\frac{W}{V} RT \left[ k_{\text{SRM}}^\circ \exp\left(\frac{E_{\text{SRM}}}{R} \left(\frac{1}{T} - \frac{1}{T_{\text{avg}}}\right)\right) \right] p_{\text{CH}_4} p_{\text{H}_2\text{O}}}{(1 + K_{\text{CO}_2}^A p_{\text{CO}_2})^4} \left(1 - \frac{p_{\text{CO}} p_{\text{H}_2}^3}{K_{\text{SRM}} p_{\text{CH}_4} p_{\text{H}_2\text{O}}}\right) \quad \text{B.3}$$

$$\frac{dp_{\text{CO}_2}}{dt} = \frac{\frac{W}{V} RT \left[ k_{\text{WGS}}^\circ \exp\left(\frac{E_{\text{WGS}}}{R} \left(\frac{1}{T} - \frac{1}{T_{\text{avg}}}\right)\right) \right] p_{\text{CO}} p_{\text{H}_2\text{O}}}{(1 + K_{\text{CO}_2}^A p_{\text{CO}_2})^2} \left(1 - \frac{p_{\text{CO}_2} p_{\text{H}_2}}{K_{\text{WGS}} p_{\text{CO}} p_{\text{H}_2\text{O}}}\right) \quad \text{B.4}$$

$$\frac{dp_{\text{CH}_4}}{dt} = - \frac{\frac{W}{V} RT \left[ k_{\text{SRM}}^\circ \exp\left(\frac{E_{\text{SRM}}}{R} \left(\frac{1}{T} - \frac{1}{T_{\text{avg}}}\right)\right) \right] p_{\text{CH}_4} p_{\text{H}_2\text{O}}}{(1 + K_{\text{CO}_2}^A p_{\text{CO}_2})^4} \left(1 - \frac{p_{\text{CO}} p_{\text{H}_2}^3}{K_{\text{SRM}} p_{\text{CH}_4} p_{\text{H}_2\text{O}}}\right) \quad \text{B.5}$$

$$\frac{dp_{\text{H}_2}}{dt} = \frac{\frac{W}{V} RT \left[ k_{\text{WGS}}^\circ \exp\left(\frac{E_{\text{WGS}}}{R} \left(\frac{1}{T} - \frac{1}{T_{\text{avg}}}\right)\right) \right] p_{\text{CO}} p_{\text{H}_2\text{O}}}{(1 + K_{\text{CO}_2}^A p_{\text{CO}_2})^2} \left(1 - \frac{p_{\text{CO}_2} p_{\text{H}_2}}{K_{\text{WGS}} p_{\text{CO}} p_{\text{H}_2\text{O}}}\right) \\ + 3 \frac{\frac{W}{V} RT \left[ k_{\text{SRM}}^\circ \exp\left(\frac{E_{\text{SRM}}}{R} \left(\frac{1}{T} - \frac{1}{T_{\text{avg}}}\right)\right) \right] p_{\text{CH}_4} p_{\text{H}_2\text{O}}}{(1 + K_{\text{CO}_2}^A p_{\text{CO}_2})^4} \left(1 - \frac{p_{\text{CO}} p_{\text{H}_2}^3}{K_{\text{SRM}} p_{\text{CH}_4} p_{\text{H}_2\text{O}}}\right)$$

$$\frac{dp_{H_2O}}{dt} = - \frac{\frac{W}{V} RT \left[ k_{WGS}^{\circ} \exp \left( \frac{E_{WGS}}{R} \left( \frac{1}{T} - \frac{1}{T_{avg}} \right) \right) \right] p_{CO} p_{H_2O}}{(1 + K_{CO_2}^A p_{CO_2})^2} \left( 1 - \frac{p_{CO_2} p_{H_2}}{K_{WGS} p_{CO} p_{H_2O}} \right) - \frac{\frac{W}{V} RT \left[ k_{SRM}^{\circ} \exp \left( \frac{E_{SRM}}{R} \left( \frac{1}{T} - \frac{1}{T_{avg}} \right) \right) \right] p_{CH_4} p_{H_2O}}{(1 + K_{CO_2}^A p_{CO_2})^4} \left( 1 - \frac{p_{CO} p_{H_2}^3}{K_{SRM} p_{CH_4} p_{H_2O}} \right) \quad B.6$$

### S3. CO<sub>2</sub> Adsorption Parameter Calculations

The Langmuir adsorption isotherm equation was fitted to the adsorbed volumes of CO<sub>2</sub>.

$$\frac{V_{CO_2}^A}{V_m} = \frac{K_{CO_2}^A p_{CO_2}}{1 + K_{CO_2}^A p_{CO_2}} \quad C.1$$

where  $V_{CO_2}^A$  is the volume of CO<sub>2</sub> adsorbed on the catalyst,  $p_{CO_2}$  is the CO<sub>2</sub> partial pressure,  $V_m$  is the adsorbed volume to form a monolayer and  $K_{CO_2}^A$  is the CO<sub>2</sub> equilibrium adsorption constant. Linearizing equation A.1:

$$\frac{1}{V_{CO_2}^A} = \frac{1}{K_{CO_2}^A p_{CO_2} V_m} + \frac{1}{V_m} \quad C.2$$

**Figure S1** shows the inverse of CO<sub>2</sub> adsorbed volume ( $1/V_{CO_2}^A$ ), versus the inverse of the CO<sub>2</sub> pressure ( $1/p_{CO_2}$ ). On this basis ( $1/V_m K_{CO_2}^A$ ) slope and  $K_{CO_2}^A$  are calculated.

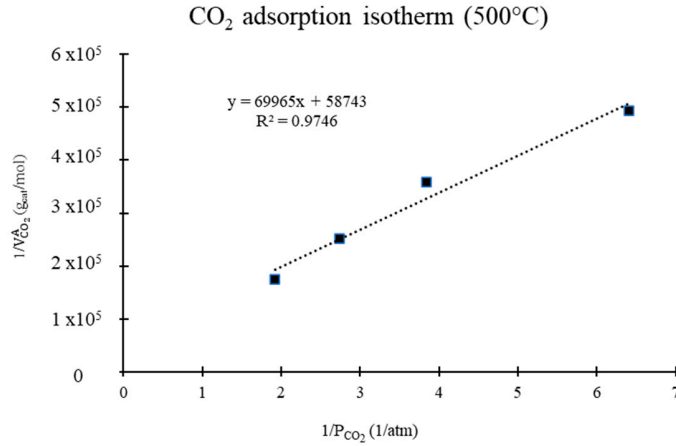

**Figure S1.** CO<sub>2</sub> adsorption isotherm at 500°C, catalyst 5%Ni-0.25%Ru/γAl<sub>2</sub>O<sub>3</sub>.

**Table S1** reports the  $K_{CO_2}^A$  adsorption constants at the four temperature levels using this approach.

**Table S1.** CO<sub>2</sub> adsorption constants at different temperatures.

| T (°C) | K <sub>CO<sub>2</sub></sub> <sup>A</sup> (atm <sup>-1</sup> ) |
|--------|---------------------------------------------------------------|
| 500    | 0.84                                                          |
| 550    | 0.57                                                          |
| 600    | 0.4                                                           |
| 650    | 0.35                                                          |

Furthermore, considering the integrated van't Hoff equations for CO<sub>2</sub> adsorption, one can calculate the CO<sub>2</sub> adsorption intrinsic parameters, K<sub>CO<sub>2</sub></sub><sup>°</sup> and the adsorption enthalpy ΔH<sub>CO<sub>2</sub></sub><sup>ads</sup> as follows:.

$$K_{CO_2}^A = K_{CO_2}^{\circ} \exp \left( -\frac{\Delta H_{CO_2}^{ads}}{R} \left( \frac{1}{T} - \frac{1}{T_{avg}} \right) \right) \quad C. 3$$

**Figure S2**, reports a graphic of the linearized Equation (A.3), with the slope and the ordinate providing K<sub>CO<sub>2</sub></sub><sup>°</sup> and ΔH<sub>CO<sub>2</sub></sub><sup>ads</sup> parameters as reported In **Table 7**.

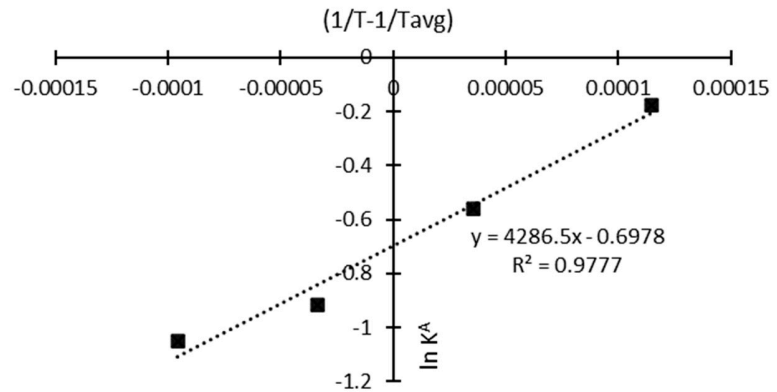**Figure S2.** Fitting of linearized CO<sub>2</sub> adsorption isotherm to the experimental data at different temperatures, for parameter estimation.

#### S4. Determination of CO<sub>2</sub> Adsorption Constants

Regarding Calculation of CO<sub>2</sub> adsorption constants Table S2 reports the following:

- Column 1: the argon pressure prior to the experiment,
- Column 2: the injected CO<sub>2</sub> to columns,
- Column 3: the calculated injected CO<sub>2</sub> in moles,
- Column 4: the calculated pressure at the reactor temperature,
- Column 5: the measured pressure following CO<sub>2</sub> injection. T
- Column 6: the pressure difference between calculated measured pressures

- g) Column 7: the CO<sub>2</sub> adsorbed moles calculated using the total pressure difference.
- h) Column 8: the CO<sub>2</sub> adsorbed moles per gram of catalyst (Q), calculated on the basis of the 0.545 g catalyst sample used.
- i) Column 9: the inverse of Q,
- j) Column 10: the calculated CO<sub>2</sub> partial pressure using Dalton's law, with p<sub>CO2</sub> being the CO<sub>2</sub> partial pressure, y<sub>CO2</sub> the CO<sub>2</sub> molar fraction and P<sub>T</sub> the reactor total pressure.
- k) Column 11: the p<sub>CO2</sub> inverse.

**Table S2.** Degree of coverage and partial pressure of CO<sub>2</sub> at different injected amounts of CO<sub>2</sub>.

| Initial pressure measured of Ar (atm) | Injected volume of CO <sub>2</sub> (ml) | Moles of CO <sub>2</sub> (μmol) | Initial pressure measured of Ar (atm) | Theoretical pressure after injection (atm) | Pressure measured after injection (atm) | Pressure difference (Theoretical-Experimental) (atm) | Moles of CO <sub>2</sub> (μmol) | Q (μmol/gcat) | 1/Q (gcat/mol)        | p <sub>CO2</sub> (atm) | 1/ p <sub>CO2</sub> (1/atm) |
|---------------------------------------|-----------------------------------------|---------------------------------|---------------------------------------|--------------------------------------------|-----------------------------------------|------------------------------------------------------|---------------------------------|---------------|-----------------------|------------------------|-----------------------------|
| 0.95                                  | 3                                       | 124.30                          | 0.95                                  | 1.11                                       | 1.087                                   | 0.0268                                               | 1.452                           | 2.02          | 4.94x10 <sup>5</sup>  | 0.156                  | 6.40                        |
| 0.94                                  | 5                                       | 207.16                          | 0.94                                  | 1.2                                        | 1.16                                    | 0.037                                                | 2.00                            | 2.79          | 1.22 x10 <sup>5</sup> | 0.26                   | 3.84                        |
| 0.97                                  | 7                                       | 290.03                          | 0.97                                  | 1.34                                       | 1.29                                    | 0.0525                                               | 2.84                            | 3.97          | 2.52 x10 <sup>5</sup> | 0.364                  | 2.74                        |
| 0.96                                  | 10                                      | 414.33                          | 0.96                                  | 1.48                                       | 1.40                                    | 0.0757                                               | 4.10                            | 5.72          | 1.55 x10 <sup>5</sup> | 0.52                   | 1.92                        |

Thus, and on the basis of 1/Q and 1/p<sub>CO2</sub> plots the adsorption isotherm was established at 550°C, 600°C and 650°C, with the CO<sub>2</sub> adsorption constants obtained as reported in Table S1.
